# Supplementary material for: HIV-1 Fusion with CD4+ T cells Is Promoted by Proteins Involved in Endocytosis and Intracellular Membrane Trafficking
Source: Viruses. 2019 Jan 25;11(2):100. doi: 10.3390/v11020100 (PMC6409670; doi:10.3390/v11020100)
Supplement: Supplementary file 1 [file viruses-11-00100-s001.zip › Table S1.xlsx]

## Sheet: TableS1
	Category	Gene	Fold decrease in HIV-1 fusion	STD
	Cytoskeleton dynamics	ACTL6B	1.57354	0.324864
		ACTN4	1.38372	0.154147
		ACTR3	1.32346	0.262832
		ARHGAP4	1.66429	0.100257
		ARRB1	1.05646	0.073615
		BAIAP2	1.40481	0.181127
		BAIAP2L1	1.73005	0.183964
		CDC42	1.32705	0.310606
		CEACAM4	0.981451	0.105502
		CFL1	1.26019	0.112015
		CTTN	1.29065	0.0782781
		DIAPH3	1.06238	0.214823
		DNM2	1.43056	0.617828
		DYNC2H1	1.11126	0.113922
		EZR	0.995792	0.175496
		FER	1.14428	0.0828451
		FLNA	1.84944	0.332236
		FNBP1L	1.29805	0.170527
		KRT17	1.16338	0.340564
		LIMK1	1.18224	0.0822059
		MSN	1.16831	0.105106
		MYH10	1.0538	0.0921435
		MYH9	1.09519	0.216059
		MYO10	1.41058	0.198765
		MYOM1	1.27283	0.0959184
		PAK1	0.802727	0.0982953
		PAK2	0.849415	0.0668854
		PSTPIP1	0.957173	0.0934768
		RAC1	1.22044	0.181538
		RDX	0.844896	0.141828
		ROCK1	0.925556	0.0985807
		SDCBP	0.902166	0.195877
		TLN1	1.53445	0.26445
		TNNC2	1.35355	0.217021
		TRIO	1.53241	0.308217
		TRIP10	1.35674	0.124947
		TUBAL3	1.18692	0.153799
		VAV1	0.998274	0.0587639
		VCL	0.861719	0.0492981
		WASF2	1.23839	0.310425
		WASL	1.45023	0.416708
		DAAM1	Toxic
		FNBP1	Toxic
		SRGAP3	Toxic
		SSH1	Toxic
		AMPH	Toxic
	RAB small GTPases & their effectors	RAB1A	0.886576	0.435869
		RAB24	1.18048	0.210851
		RAB3A	1.54864	0.139052
		RAB4A	1.51286	0.127598
		RAB5A	2.86496	0.330649
		RAB6C	0.948322	0.0692097
		RAB8A	1.34221	0.152322
		RAB9A	0.850893	0.0724403
		RAB11A	2.09817	0.461283
		RAB11FIP1	1.35239	0.0985033
		RAB14	1.68062	0.215055
		RAB15	0.954014	0.101001
		RABEP1	1.90803	0.339958
		RABEPK	1.42334	0.299225
		RABGEF1	0.782867	0.0488349
		C7orf28A	0.934809	0.153782
		CCZ1	1.23284	0.479805
		EEA1	1.27286	0.139509
		MON1A	1.33954	0.18011
		PLEKHF2	0.957459	0.08927
	SNAREs & their effectors	STX1B	1.00605	0.121638
		STX2	1.2365	0.106027
		STX3	1.05478	0.0924026
		STX4	0.974674	0.215688
		STX5	1.47085	0.59667
		STX6	1.47966	0.196913
		STX7	1.13989	0.149858
		STX8	1.81551	0.286401
		STX11	1.15863	0.229337
		STX12	1.50692	0.297515
		STX18	1.01649	0.0597
		SNAP29	1.38194	0.247962
		SNAP47	1.15266	0.0688243
		VAMP1	0.859232	0.086065
		VAMP2	1.2349	0.113363
		VAMP3	1.25378	0.267317
		VAMP8	1.05324	0.0567894
		STXBP1	1.71143	0.309886
		STXBP2	2.29771	0.21503
		STXBP3	0.820117	0.0633991
		SNAP23	Toxic
		STX17	Toxic
		VAMP7	Toxic
	Sorting nexins	SNX1	1.23148	0.378443
		SNX2	1.09716	0.0955269
		SNX3	1.98907	0.337119
		SNX4	1.55912	0.187386
		SNX5	1.67451	0.281072
		SNX6	0.89894	0.164626
		SNX7	1.45117	0.195649
		SNX9	1.72189	0.334094
		SNX12	0.97997	0.0809352
		SNX14	1.02536	0.0916268
		SNX15	1.48296	0.152152
		SNX17	0.85636	0.0459158
		SNX18	1.12002	0.0609352
		SNX19	1.26851	0.0707412
		SNX24	1.03149	0.0709071
		SNX27	1.12206	0.127694
		SNX30	1.08452	0.156514
		SNX32	1.10935	0.139776
		SNX8	Toxic
		SNX11	Toxic
	Vesicle trafficking, sorting and membrane	VPS11	0.844777	0.154444
	and membrane remodelling	VPS18	0.968607	0.166473
		VPS24	1.11493	0.0800862
		VPS26A	1.28394	0.103265
		VPS28	1.33736	0.13114
		VPS29	1.74128	0.114569
		VPS33A	0.993754	0.0678299
		VPS35	1.24795	0.0892264
		VPS39	1.64139	0.135889
		VPS53	1.13683	0.290919
		ATP6AP1	1.37872	0.199373
		ATP6V0A1	1.12533	0.111721
		SH3GL1	1.17182	0.0989222
		SH3GL2	1.50975	0.527411
		SH3GL2	1.06892	0.138
		FCHO1	1.09058	0.21012
		FCHO2	1.64275	0.1762
		BIN1	1.25731	0.0722931
		BIN2	1.07989	0.129513
		MTSS1	1.46478	0.343928
		SYT1	0.861808	0.0540905
		KIF16B	1.30181	0.182759
		KIF18A	1.01794	0.240539
		KIF19	0.76968	0.146312
		ARF1	1.48654	0.368798
		ARF6	1.7119	0.166261
		FLOT1	1.36877	0.119351
		VPS41	Toxic
		VPS37B	Toxic
	Lipid metabolism	ANXA6	1.21323	0.156003
		INPP4A	1.36959	0.104587
		INPPL1	1.0251	0.136079
		IPLA2	2.34107	0.132313
		OCRL	1.5382	0.267659
		PIK3CA	1.00532	0.105098
		PIKFYVE	1.08266	0.0973292
		PIP5K1A	1.62838	0.349542
		PLCB1	0.462443	0.0812842
		PNPLA3	0.970188	0.0651382
		PNPLA8	1.60749	0.13942
		SGMS2	1.17822	0.112477
		SMPD2	1.55346	0.207972
		SMPD3	1.23142	0.158934
		SYNJ1	0.834645	0.0641145
		VAC14	1.84952	0.304892
		ANXA5	Toxic
		PIK3R1	Toxic
	Tetraspanins	CD63	1.12361	0.284263
		CD81	1.06301	0.076613
		CD82	1.27614	0.120223
		CD9	0.823805	0.117821
		TSPAN4	1.62426	0.119882
	Others	ABL1	1.18152	0.189004
		ARRB1	1.05646	0.073615
		BECN1	1.84018	0.389765
		CACNA2D2	1.04858	0.0781571
		CHMP1A	1.54559	0.347527
		CHMP2A	0.37079	0.0362945
		CHMP6	1.20036	0.37813
		CLDN3	0.998139	0.164145
		CUL3	0.823188	0.0535541
		HDAC10	0.977153	0.0722506
		HDAC6	1.14591	0.162889
		HGS	0.855979	0.0557773
		HSPA14	1.18132	0.185383
		IGSF8	1.23114	0.0867762
		ITK	1.19748	0.235584
		JAK1	1.37189	0.354557
		LCK	1.6075	0.353142
		NRP1	1.06693	0.0746966
		NRP2	1.58306	0.161611
		NTC	1.26571	0.280901
		PDIA2	1.23893	0.0857684
		PDIA3	1.3886	0.17866
		PRKCA	0.842964	0.235412
		PTK2B	1.36979	0.114498
		RGS4	1.05955	0.0864792
		SLC9A1	1.39575	0.211101
		SRGAP1	0.984014	0.0927339
		TIAM1	1.57131	0.216892
		UVRAG	1.72988	0.429004
		KIAA0226	Toxic
		CHMP7	Toxic
		HDAC9	Toxic
		ZAP70	Toxic
	HIV-1 receptor	CD4	1.93466	0.627402
	HIV-1 coreceptor	CXCR4	1.86614	0.239964
	Fusion inhibitor	AMD3100	6.45977	0.38524
